# Supplementary material
Source: PubMed Central journal article supplement (PMC6182124)
Supplement: supp_6.3.E322_2017-0138-2-at.pdf [file supp_6.3.E322_2017-0138-2-at.pdf]

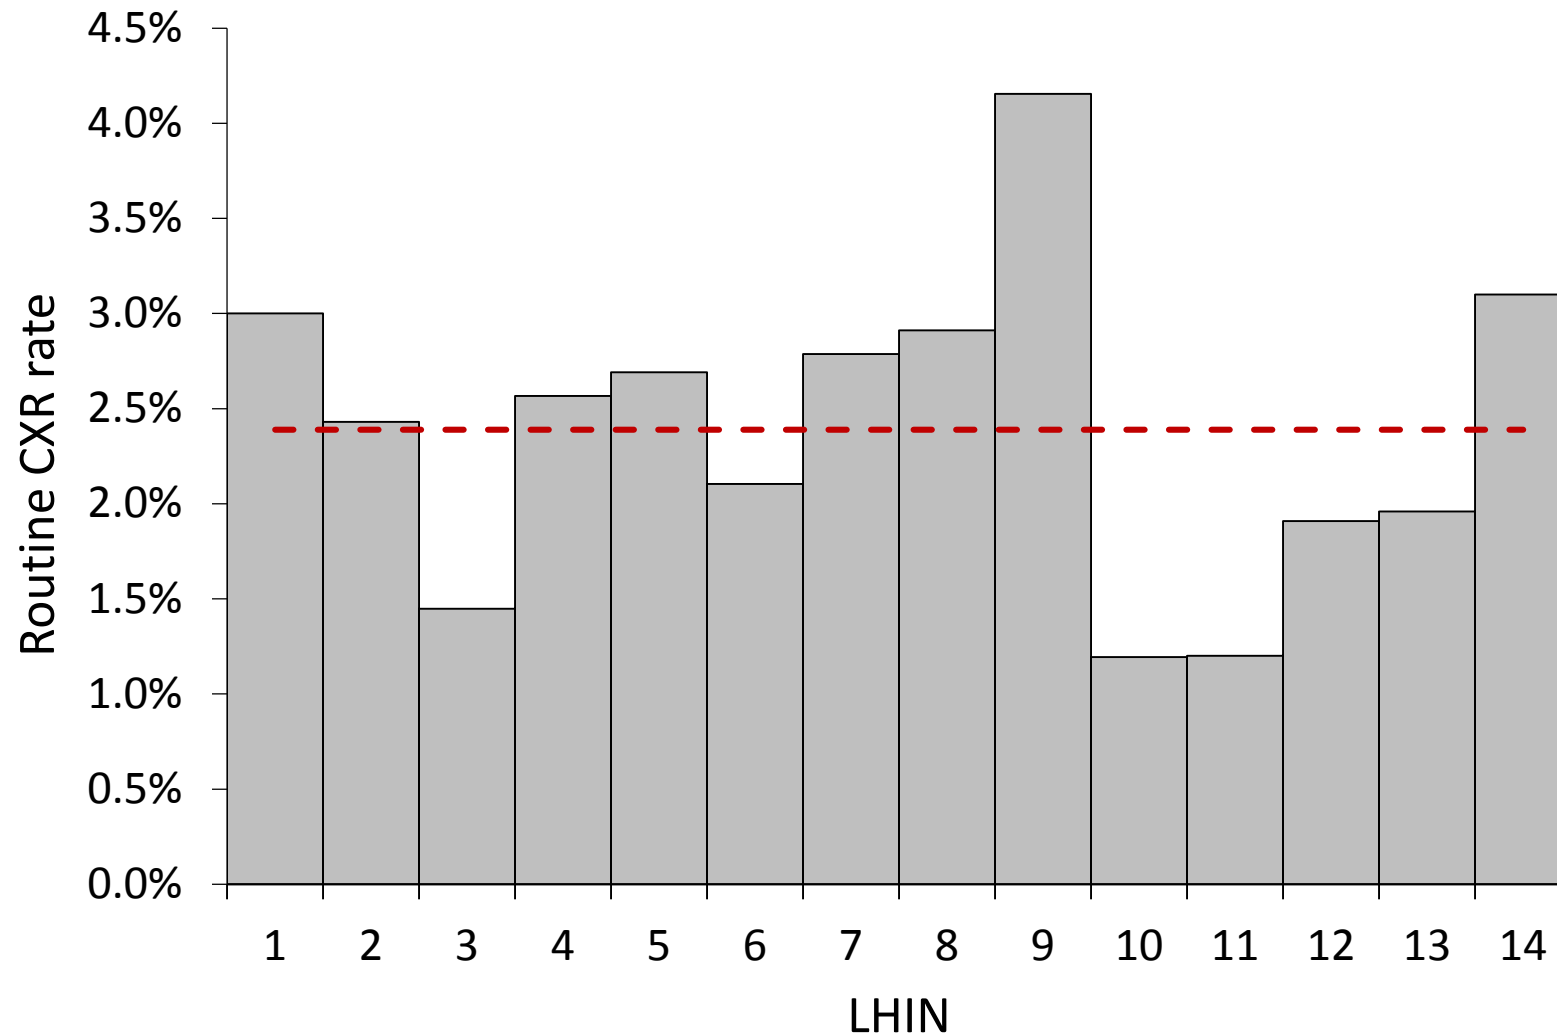

Appendix 2. Supplemental Figure 1 (as supplied by the authors). Routine chest X-ray (CXR) ordering rate based on Local Health Integrated Network (LHIN).

Note: The hatched, horizontal line represents the overall mean rate.
