# Supplementary material
Source: PubMed Central journal article supplement (PMC6182124)

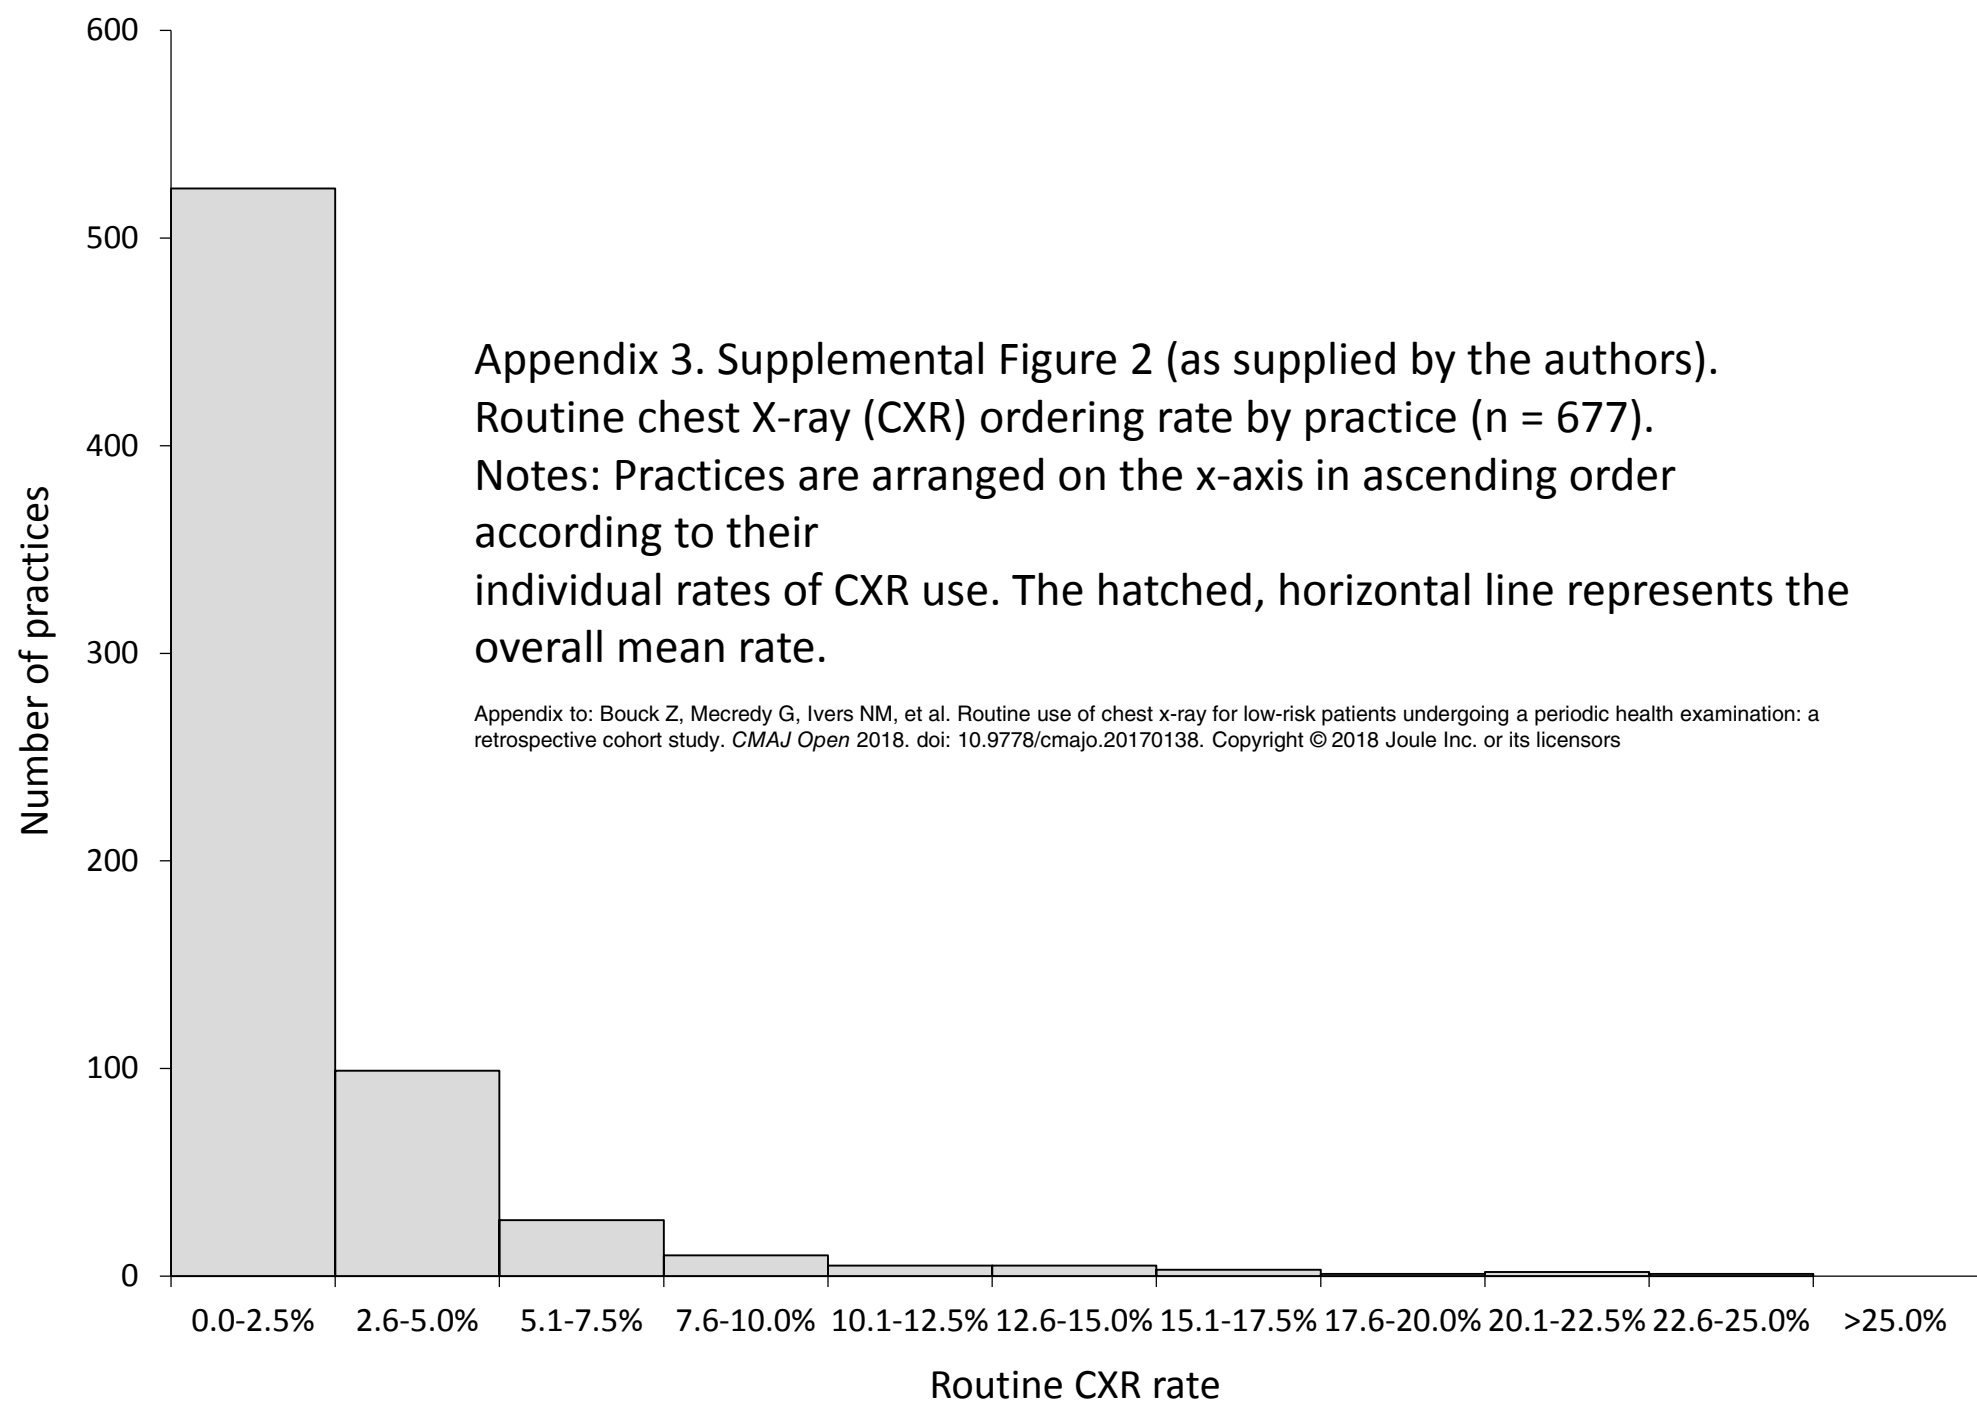

Supplement: supp_6.3.E322_2017-0138-3-at.pdf [file supp_6.3.E322_2017-0138-3-at.pdf]
